# Supplementary material for: A straightforward access to ruthenium-coordinated fluorophosphines from phosphorous oxyacids
Source: Royal Society of Chemistry journal article supplement (doi:10.1039/c5dt04624f), 2015-12-22
Supplement: c5dt04624f1.pdf [file c5dt04624f1.pdf]

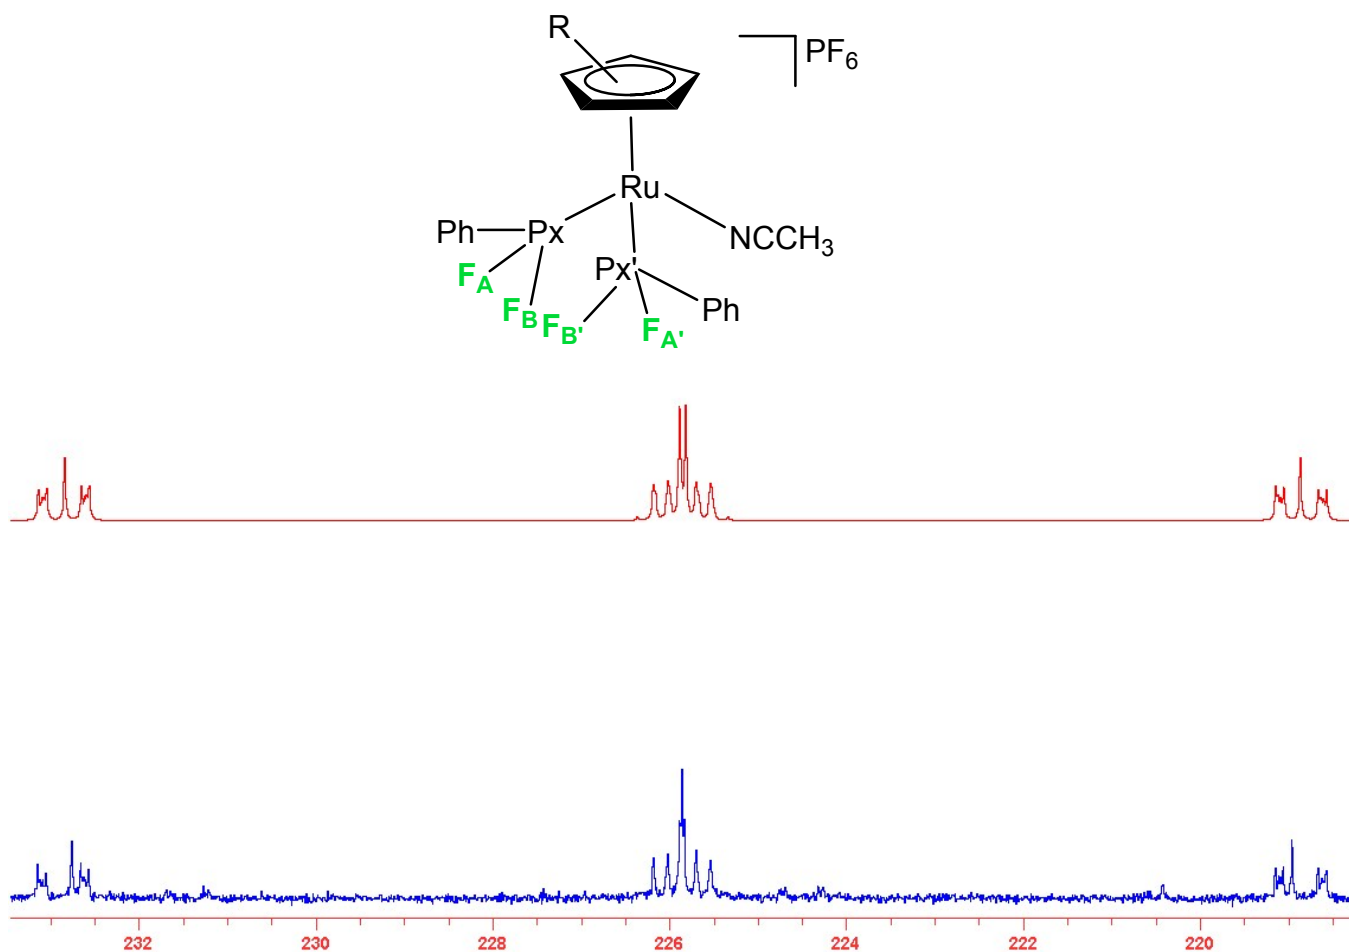

Figure 1S. Computed (top) and experimental (bottom)  $^{31}\text{P}\{^1\text{H}\}$  NMR spectrum of  $[(\text{C}_5\text{Me}_5)\text{Ru}(\text{CH}_3\text{CN})(\text{PhPF}_2)_2]\text{PF}_6$  (acetone- $d_6$ , 161.89 MHz, 294 K)

Table 1S. Calculated values for coupling constants  $J$  for  $[(\text{C}_5\text{Me}_5)\text{Ru}(\text{CH}_3\text{CN})(\text{PhPF}_2)_2]\text{PF}_6$ . Labels are taken from Figure 1S.

| Nucleus                | $\delta(\text{ppm})$ | $\text{P}_{\text{X}'}$ | $\text{F}_{\text{A}}$ | $\text{F}_{\text{B}}$ | $\text{F}_{\text{A}'}$ | $\text{F}_{\text{B}'}$ |
|------------------------|----------------------|------------------------|-----------------------|-----------------------|------------------------|------------------------|
| $\text{P}_{\text{X}}$  | 225.85               | 78.38                  | 1143.75               | -1117.90              | -9.36                  | -4.36                  |
| $\text{P}_{\text{X}'}$ | 225.85               | ---                    | -5.36                 | -9.36                 | 1143.75                | -1117.90               |
| $\text{F}_{\text{A}}$  | ---                  |                        | ---                   | 48.70                 | ---                    | ---                    |
| $\text{F}_{\text{B}}$  | ---                  |                        |                       | ---                   | ---                    | ---                    |
| $\text{F}_{\text{B}'}$ | ---                  |                        |                       |                       | ---                    | 42.0                   |
